# Supplementary material for: Brain Mapping of Behavioral Domains Using Multi-Scale Networks and Canonical Correlation Analysis
Source: Frontiers journal article supplement (doi:10.3389/fnins.2022.889725), 2022-06-21
Supplement: Data_Sheet_1.pdf [file Data_Sheet_1.pdf]

## Supplementary Material

### 1 SUPPLEMENTARY TABLES AND FIGURES

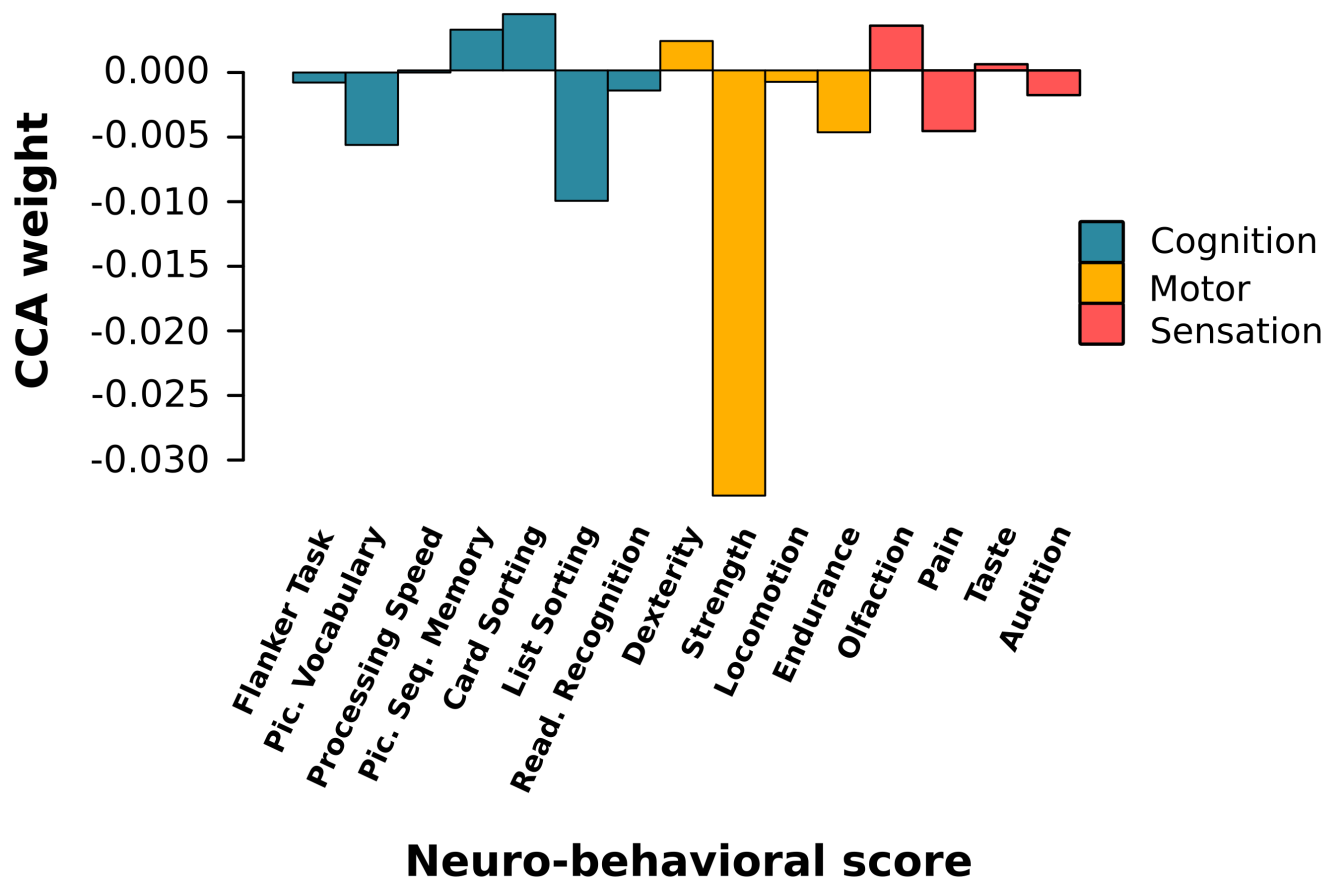

Figure S1: CCA weights for all neuro-behavioral scores. Because the weight for the Strength variable was much higher than others, this variable was skip for all the analysis in this work.

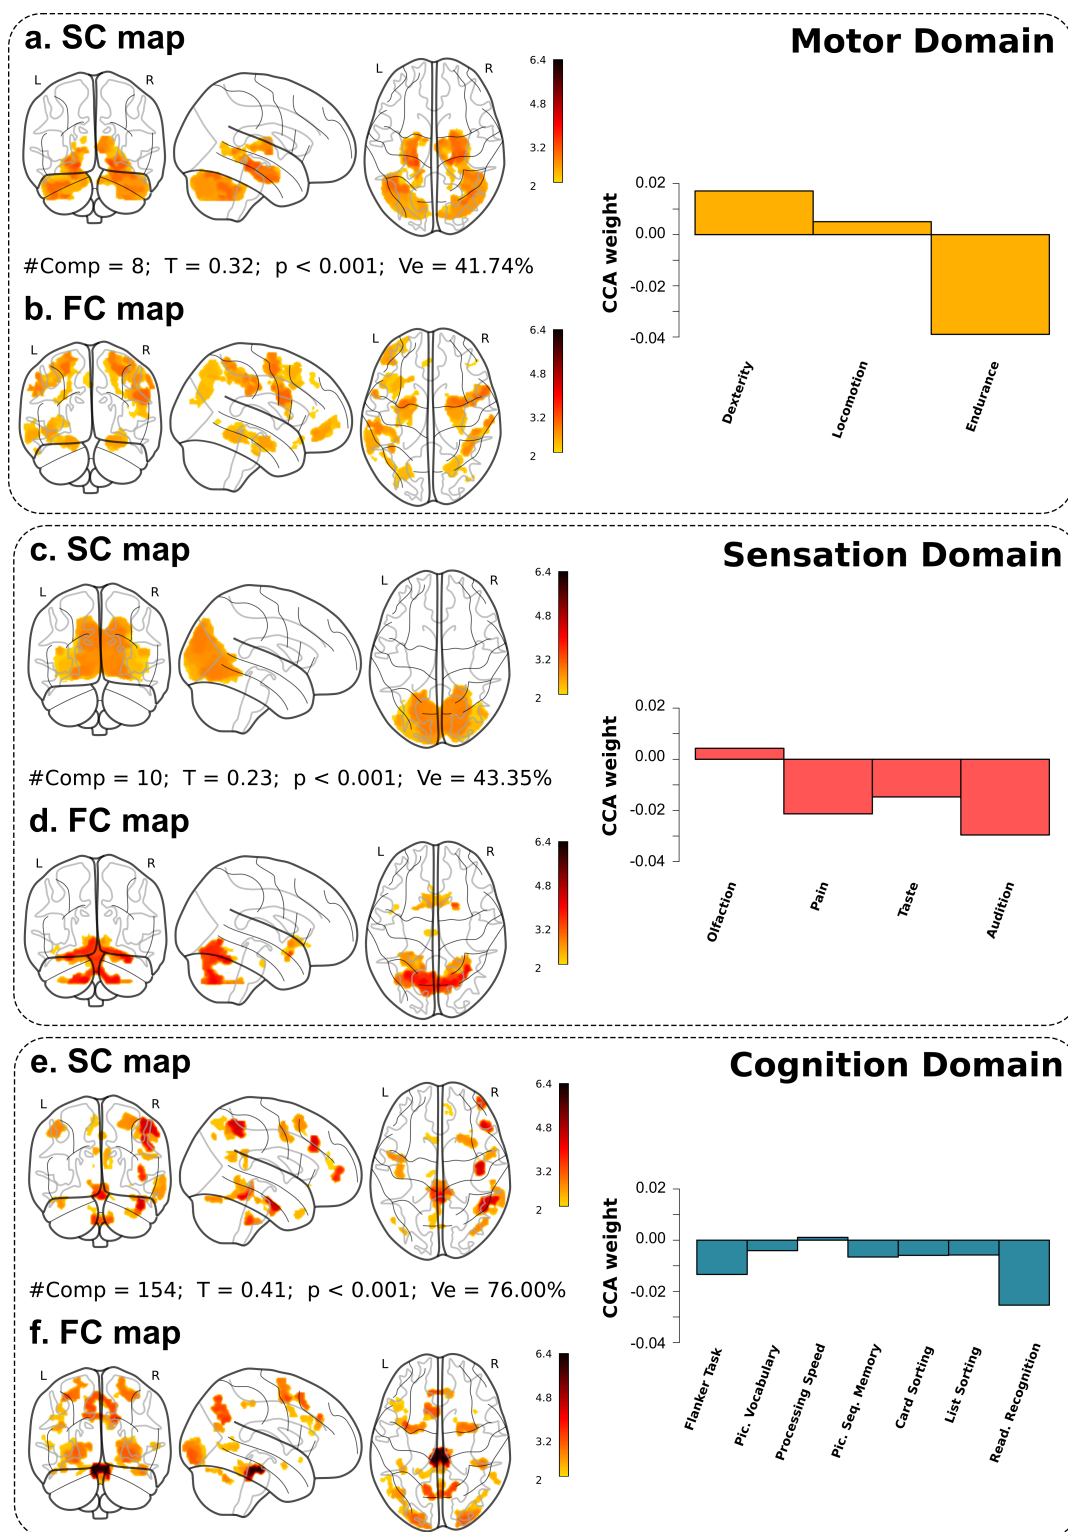

Figure S2: Brain maps and CCA weights resulting from the association between connectivity and unidomain behavioural scores.

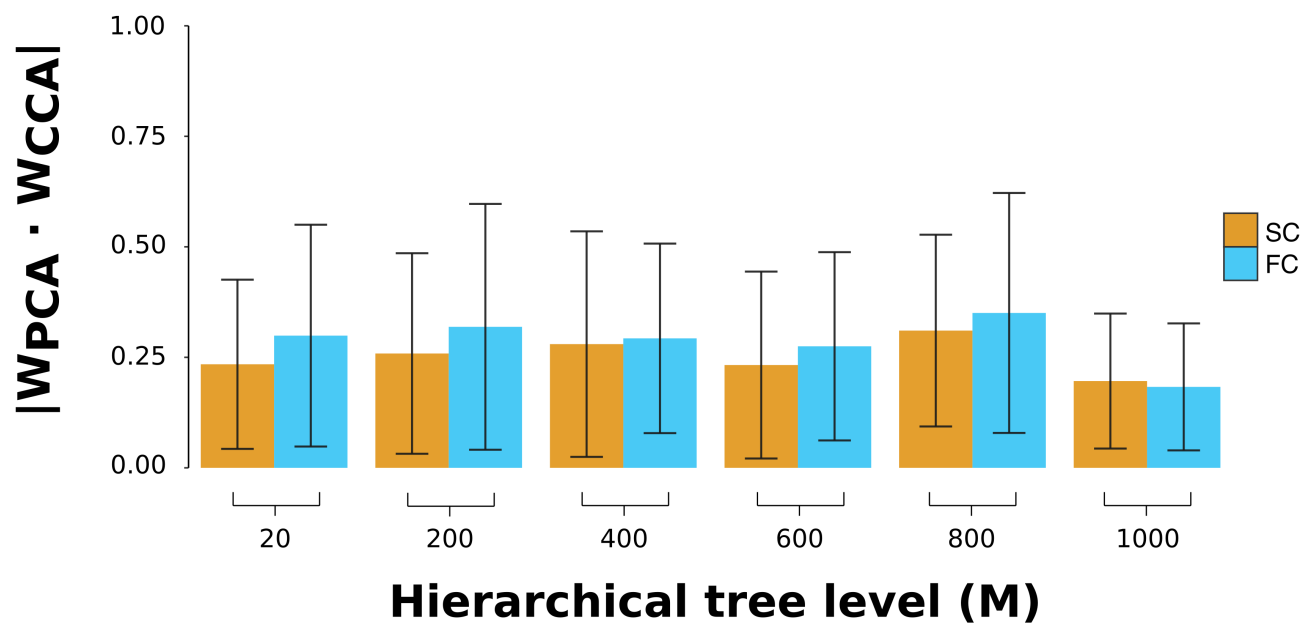

Figure S3: **Normalized total weights across multiple scales (represented by M).** Normalized total weights were built as the product between the weights of the PCA multiplied by the ones of the CCA. Histogram values across different scales, represented by the level M of the hierarchical tree. In blue we plot the histogram of functional weights and in yellow the one for structural weights.

|                                       | UNIDOMAIN        |              |                  |           |       |           | MULTIDOMAIN<br>(C+M+S) |           |
|---------------------------------------|------------------|--------------|------------------|-----------|-------|-----------|------------------------|-----------|
|                                       | SC (%)           |              |                  | FC (%)    |       |           | SC<br>(%)              | FC<br>(%) |
|                                       | Cognition<br>(C) | Motor<br>(M) | Sensation<br>(S) | Cognition | Motor | Sensation |                        |           |
| <b>Visual</b>                         | 0.99             | 1.06         | 15.91            | 4.25      | 1.33  | 11.15     | 1.00                   | 2.89      |
| <b>Somatomotor</b>                    | 3.56             | 3.43         | 6.59             | 0.99      | 0.28  | 0.02      | 4.56                   | 0.81      |
| <b>Dorsal Attention</b>               | 5.08             | 2.69         | 0.86             | 1.63      | 6.54  | 3.30      | 2.87                   | 3.58      |
| <b>Salience Ventral<br/>Attention</b> | 1.93             | 7.20         | 5.75             | 0.86      | 1.54  | 5.31      | 4.03                   | 1.25      |
| <b>Limbic</b>                         | 6.16             | 3.34         | 1.29             | 2.54      | 0.33  | 0.67      | 3.65                   | 3.30      |
| <b>Frontoparietal</b>                 | 3.02             | 7.84         | 0.38             | 1.87      | 3.37  | 3.27      | 4.49                   | 6.88      |
| <b>DMN</b>                            | 2.28             | 2.29         | 0.06             | 0.98      | 3.87  | 0.47      | 2.90                   | 4.62      |

Table S1: **Jaccard similarity index as a measure for overlapping percentage (%) between resting-state networks and resulting brain maps from unimodal analyses.** For easier reading, we colored in red the overlapping values commented in the text. DMN: Default Mode Network.

|                                       | UNIDOMAIN        |              |                  |           |       |           | MULTIDOMAIN<br>(C+M+S) |           |
|---------------------------------------|------------------|--------------|------------------|-----------|-------|-----------|------------------------|-----------|
|                                       | SC (%)           |              |                  | FC (%)    |       |           | SC<br>(%)              | FC<br>(%) |
|                                       | Cognition<br>(C) | Motor<br>(M) | Sensation<br>(S) | Cognition | Motor | Sensation |                        |           |
| <b>Visual</b>                         | 0.28             | 2.77         | 52.70            | 7.68      | 1.36  | 0.71      | 0.78                   | 5.27      |
| <b>Somatomotor</b>                    | 1.38             | 0.12         | 0.08             | 1.11      | 0.95  | 1.78      | 3.71                   | 0.29      |
| <b>DorsalAttention</b>                | 3.38             | 0.54         | 0.41             | 4.89      | 14.25 | 2.85      | 3.99                   | 10.23     |
| <b>Salience Ventral<br/>Attention</b> | 1.04             | 3.86         | 0.09             | 1.52      | 1.44  | 7.14      | 3.61                   | 0.75      |
| <b>Limbic</b>                         | 3.43             | 1.31         | 0.23             | 1.11      | 1.39  | 3.22      | 3.26                   | 2.49      |
| <b>Frontoparietal</b>                 | 6.20             | 10.42        | 0.02             | 3.81      | 4.45  | 1.43      | 4.29                   | 1.94      |
| <b>DMN</b>                            | 1.73             | 8.04         | 0.03             | 1.19      | 5.15  | 1.01      | 4.96                   | 2.84      |

Table S2: Jaccard similarity index as a measure for overlapping percentage (%) between resting-state networks and resulting brain maps from the **multimodal analysis**. For easier reading, we colored in red the overlapping values commented in the text. DMN: Default Mode Network.
